1 **Behavioral Responses to Fevers and Other Medical Events in Children With and Without**  
2 **ASD**

3  
4  
5 Katherine Byrne<sup>1</sup>, Shuting Zheng<sup>2</sup>, Ph.D., Somer Bishop<sup>2</sup>, Ph.D., Juliana Boucher<sup>3</sup>, Sheila  
6 Ghods<sup>2</sup>, So Hyun Kim<sup>4</sup>, Ph.D., & Catherine Lord<sup>1</sup>, Ph.D.

7  
8  
9 **Affiliations:** <sup>1</sup>University of California, Los Angeles; <sup>2</sup>University of California, San Francisco;  
10 <sup>3</sup>Penn State University; <sup>4</sup>Weill Cornell Medicine

11  
12 **Address correspondence to:** Katherine Byrne, Semel Institute for Neuroscience and Human  
13 Behavior, 760 Westwood Plaza 68-265, Los Angeles, CA 90024, [[kabyrne@mednet.ucla.edu](mailto:kabyrne@mednet.ucla.edu)],  
14 (310) 206-6628

15  
16 **Short title:** Behavioral Responses to Fevers

17  
18 **Conflict of Interest Disclosures:** KB, SZ, SB, JB, SHK, and CL have no potential conflicts to  
19 declare.

20  
21 **Funding/Support:** This work was supported by a grant from SFARI (419178, CL).

22  
23 **Role of Funder/Sponsor:** The Simons Foundation had no role in the design and conduct of the  
24 study.

25  
26 **Clinical Trial Registration:** N/A

27  
28 **Abbreviations:** Autism spectrum disorder (ASD); typically developing (TD).

29  
30 **Article Summary**

31 This study examines behavioral changes during fever and other medical events in children with  
32 autism compared to behavioral changes in a typically developing control group.

33  
34 **What's Known on this Subject**

35 Previous research and consistent anecdotal reports suggest the possibility of behavioral  
36 improvements for children with autism during a fever. There is a dearth of prospectively  
37 collected data examining these effects.

38  
39 **What This Study Adds**

40 Children with autism consistently had stronger and more frequent negative behavior changes  
41 during fever than typical children who also primarily showed worsening of behavior during  
42 fevers. Three autistic children, and no typical children, showed improvements in varied areas  
43 during fevers.

44 **Contributors' Statement Page**

45

46 Katherine Byrne collected data, drafted the initial manuscript, and reviewed and revised the  
47 manuscript.

48

49 Dr. Zheng carried out the initial analyses and reviewed and revised the manuscript.

50

51 Drs. Bishop, Kim, and Lord designed the data collection instrument, conceptualized and  
52 designed the study, supervised data collection, and reviewed and revised the manuscript.

53

54 Juliana Boucher designed the data collection instrument, collected data, and reviewed and  
55 revised the manuscript.

56

57 Sheila Ghods collected data and reviewed and revised the manuscript.

58

59 All authors approved the final manuscript as submitted and agree to be accountable for all  
60 aspects of the work.

61 **Abstract**

62

63 **Objective**

64 Anecdotal reports and a small number of research studies suggest possible behavioral  
65 improvements in children with autism spectrum disorders (ASD) during a fever. However,  
66 previous studies rely largely on retrospective reports of this phenomenon. Establishing a robust  
67 association between fever and reduction of ASD-related symptoms would promote opportunities  
68 for the development of innovative therapeutic interventions for children with ASD.

69

70 **Methods**

71 Prospective data were collected from 141 children with ASD and 103 typically developing (TD)  
72 controls using parent responses to an 11-item behavioral survey. Behaviors when no illness was  
73 present, during a fever, the week after a fever, and during non-febrile illnesses for TD and ASD  
74 children were compared. Profiles of cases in which caregivers reported consistent behavioral  
75 improvements during fever are described.

76

77 **Results**

78 Data indicated worsening social, emotional/behavioral, and somatic symptoms during a fever  
79 regardless of diagnosis, with children with ASD demonstrating greater worsening of behaviors  
80 during a fever than TD children. Three children (all with ASD) out of 244 demonstrated  
81 consistent behavioral improvements during a fever; these children had a range of cognitive and  
82 adaptive skills.

83

84 **Conclusions**

85 Children with ASD had stronger negative responses to fever than TD children. These findings  
86 contradict previous literature suggesting behavioral improvements for children with ASD. While  
87 improvements may occur for some children, it does not appear to be a common phenomenon.  
88 Additional research is needed to elucidate the nature of behavioral improvements in the subset of  
89 children with ASD who may respond positively to fever.

90 Anecdotal reports suggesting the possibility of behavioral improvements in children with  
91 autism when they experience a fever have been made for years.<sup>1</sup> Yet, there is surprisingly little  
92 published data examining these effects. The largest study to date used retrospective caregiver-  
93 report data from a sample of over 2000 children with autism spectrum disorder (ASD) from the  
94 Simons Simplex Collection (SSC). Seventeen percent of families reported improvements in  
95 autism symptoms during a fever.<sup>2</sup> This subgroup had less speech, lower nonverbal IQs, higher  
96 levels of autism symptoms, higher levels of restricted and repetitive behaviors, and higher  
97 parent-reported levels of stereotypies, inappropriate speech, hyperactivity, and irritability as  
98 measured on the Aberrant Behavior Checklist (ABC)<sup>3</sup>, compared to children whose caregivers  
99 did not report behavioral improvements. However, this study relied solely on retrospective  
100 parent-report and was collected in response to just one (arguably leading) question: “Does your  
101 child seem to show any improvement in symptoms of autism when he/she has a fever?”<sup>3</sup> which  
102 created the potential for recall bias and inaccurate reporting.

103 In another study, Curran et al<sup>4</sup> prospectively compared scores on the ABC during a fever,  
104 after a fever, and during no fever. Eighty-three percent of caregivers reported fewer aberrant  
105 behaviors on at least one domain of the ABC during a fever. Improvements on the  
106 “lethargy/social withdrawal” subscale did not account for the behavioral changes. While use of  
107 prospective report is a significant strength of this study, data were derived from a very small  
108 sample of children with ASD who developed a fever ( $n = 30$ ) with no comparison group of  
109 children with nonfebrile illnesses. Thus, no data currently exist comparing behavior during  
110 fevers vs. non-febrile illnesses in children with ASD, or in comparison to children without ASD.  
111 Additionally, while families were blind to the researchers’ hypotheses, they, nonetheless, were

112 aware that this study was testing behavioral responses specifically to fevers, which could  
113 increase the possibility of biased reporting.

114 The current study aimed to investigate, prospectively, the association between autism and  
115 behavioral improvements during fever and non-febrile medical events in children with and  
116 without ASD. Parent reports were collected at baseline (i.e., no illness), during fevers, and during  
117 non-febrile illnesses in a sample of 141 children with ASD and 103 TD controls. We set out to  
118 understand the degree to which children with ASD have unique responses to fevers by asking the  
119 following questions: (1) Do participants exhibit behavioral changes during a fever? If so, does  
120 the nature of these changes differ for children diagnosed with ASD? (2) Do behavioral changes  
121 during a fever differ from behavioral changes during non-febrile illnesses? (3) What are the  
122 phenotypic characteristics of children who exhibit positive behavioral changes during a fever?

## 123 **Methods**

### 124 **Participants**

125 This study included 244 children; 141 were diagnosed with ASD, and 103 were TD. The  
126 majority of participants (70%) were male. The parent-reported racial/ethnic breakdown of the  
127 participants is as follows: 55% White, 16.4% Asian, 5.3% Black, 17.6% Mixed Race, and 5.7%  
128 American Indian, Pacific Islander, or Other; 24.6% identified as being Hispanic. Table 1 presents  
129 the demographic characteristics of those who had a fever and those who did not, by diagnosis.

130 Children were recruited through research databases, word-of-mouth referrals, and flyers  
131 posted in local autism clinics, pediatric offices, daycares, and schools in the greater Los Angeles,  
132 San Francisco, and New York areas. Inclusion criteria included being between the ages of 2 to 7  
133 years, having had a fever in the previous 12 months, and independently walking. If recruited for  
134 the ASD cohort, parents were asked to provide documentation of a clinical ASD diagnosis for

135 the child. Exclusion criteria included severe sensory impairment, or, if recruited for the TD  
136 cohort, a diagnosis or receipt of services for a developmental or psychiatric disorder.

137 [Insert Table 1]

### 138 **Procedures**

139 Event reporting and behavioral tracking data were collected through a smartphone  
140 application developed for the current study. During the initial study visit, research staff provided  
141 the participating parent with instructions on how to download and operate the application used  
142 for data collection. Parents and children completed a battery of questionnaires, and assessments  
143 described below.

144 Behavioral tracking lasted for three months. Once per week (at a time when no event had  
145 occurred), parents were asked to complete the behavioral survey; these data were collected as  
146 baseline measures of behavior. Parents also used the app to report on medical events, as well as  
147 other “out of the ordinary” life events that occurred, such as non-routine vacations. If parents  
148 reported an event, they were asked to explain the event that transpired and complete the  
149 behavioral survey (see Supplement 1). Each time parents submitted an event and/or completed  
150 the behavioral survey, they were asked to take and report their child’s temperature. Non-medical  
151 data were collected to conceal the specific aims and hypotheses of the study (pertaining to  
152 behavioral responses to fever) and prevent biased reporting. To address the aims of the current  
153 study, only data regarding medical events were analyzed.

154 After the three-month data collection period concluded, participants completed a subset  
155 of questionnaires. Compensation was provided to all participating families. Researchers acquired  
156 informed consent from parents with approval from the University of California, Los Angeles

157 (UCLA), University of California San Francisco (UCSF), and Weill Cornell Medical College  
158 Institutional Review Boards.

## 159 **Measures**

### 160 *Event and Behavioral Survey Reporting via App*

161 All event data were coded into one of five categories: baseline, fever, week-after-fever,  
162 non-fever medical, and other. Baseline data are those that parents submitted once per week at a  
163 time when no event had occurred. Fever data are defined as medical events in which the parent  
164 reported the child to have a fever  $\geq 100.0$  degrees Fahrenheit. Week-after-fever data are defined  
165 as data that were reported in the 7 days succeeding the final fever report. These data were  
166 considered separately from baseline to examine whether the effects of fever may last beyond the  
167 fever itself and to prevent confounding the baseline data. Non-fever medical data are defined as  
168 any medical event (e.g., gastrointestinal issues, sore throat) that occurred without a coinciding  
169 fever. “Other” data are defined as various “out of the ordinary” events that were not medical in  
170 nature.

171 The behavioral survey, created by the study team, was comprised of 11 questions  
172 regarding the child’s mood and behavior. The survey asked parents to rate, on a five-point Likert  
173 scale, how much the child exhibited a certain behavior compared to usual behavior. Lower scores  
174 indicated less than usual and higher scores indicated more than usual. For data analysis,  
175 questions nine and ten (i.e., irritability and anxiety) were reverse coded to ensure that scores of  
176 five indicated lessening behavioral symptoms (i.e., less irritability and less anxiety). For ease of  
177 interpretability, all items were then recoded to scores from -2 to 2; negative scores indicated  
178 worsening symptoms, and 0 represented the same as usual.

### 179 *Other Measures*

180 We collected various measures to characterize the sample and examine individual  
181 differences in behavioral responses to fever. The PPVT-4<sup>5</sup> is an assessment of receptive  
182 vocabulary for individuals between the ages of 2 years, 6 months through adulthood. If a child  
183 was unable to obtain a basal score on the PPVT-4, the nonverbal subtests (Visual Reception and  
184 Fine Motor) of the Mullen Scales of Early Learning (MSEL)<sup>6</sup> were administered. These tests  
185 were administered to provide an estimate of cognitive ability. Standard scores from the PPVT  
186 were used, whereas age equivalents from the MSEL were used to calculate a ratio  
187 IQ/developmental quotient.<sup>7</sup> The Vineland-3<sup>8</sup> is a semi-structured parent interview that assesses  
188 adaptive functioning in individuals from birth through adulthood. Scores from the overall  
189 Adaptive Behavior Composite (ABC) were used to provide an estimate of adaptive functioning  
190 for each participant. The SRS-2<sup>9</sup> is a parent-rated questionnaire that was collected to measure the  
191 severity of ASD-related symptoms. The PSI-4 SF<sup>10</sup> is a parent-rated questionnaire that was  
192 collected to assess parents' level of stress in the parent-child relationship. The ABC-C<sup>3</sup> is a  
193 parent-rated questionnaire that measures the behavior problems of individuals with ASD and  
194 other developmental disabilities. For purposes of this study, we used the Irritability and  
195 Hyperactivity subscales. Finally, the CBCL/1.5-5 and CBCL/6-18<sup>11</sup> are parent-rated  
196 questionnaires that assess the emotional and behavioral problems of children. For purposes of  
197 this study, we used the Internalizing and Externalizing subscales.

## 198 **Statistical Analyses**

### 199 *Preliminary Analyses*

200 **Factor Analyses of Behavioral Survey.** Exploratory factor analysis (EFA) with oblique  
201 rotation was employed to generate the latent constructs measured by the behavioral survey. EFA  
202 demonstrated that a three-factor structure fit best for the survey items: Factor 1 ("Social



203 Behaviors”) consisted of six items: happy/cheerful, talk to others, physically active,  
204 social/interested, communicating ideas, and play; Factor 2 (“Emotional and Behavioral  
205 Problems”) consisted of three items: anxious, managing behaviors, and irritable; Factor 3  
206 (“Somatic Symptoms”) consisted of two items: eat and sleep (see Supplement 2 for detailed  
207 results). The average rating of the items within each factor was calculated to represent factor  
208 scores because the number of items loading on each factor differed.

### 209 *Sample Characteristics*

210 Descriptive statistics regarding demographic and behavioral characteristics of the sample  
211 were generated. Independent samples t-tests were used to compare these characteristics between  
212 the ASD and TD cohorts (see Table 1).

### 213 *Multilevel Modeling*

214 Parent-report behavioral ratings across multiple days nested within participants were  
215 used. Multilevel models with behavioral rating factor scores as outcomes were used to account  
216 for the nesting and to capture both fixed and random effects at two levels of analysis. Level 1  
217 focused on within-individual effects; we tested whether parents were more likely to report  
218 children’s behaviors to deviate (positively or negatively) from what they usually exhibited on  
219 days when they experienced a fever, and the week after a fever, as compared to behaviors at  
220 baseline. Level 2 focused on between-individual effects; we tested whether the within-person  
221 association between behavioral changes and fever conditions differed for the ASD vs. TD  
222 samples. Sequential multilevel models were specified in SAS PROC Mixed to address the  
223 research questions respectively. Model fit indices (i.e., AIC, BIC, smaller values mean better  
224 model fit), variances explained, and parameter estimates of the fixed and random effects in each  
225 model are reported.

226 To address research questions of behavioral changes across fever conditions: First, the  
227 intraclass correlation (ICC) of each factor score was computed to reflect how much of the total  
228 variation in behavioral ratings was accounted for by individuals through the unconditional model  
229 (Model 1) with no predictors. Second, to test the effect of fever conditions, we estimated separate  
230 two-level models with each of the three factor scores as the outcome variable. We included the  
231 fixed effect of the fever condition variable (three categories: baseline, fever, and week-after)  
232 with baseline as the reference condition at Level 2 (individual level), and the random intercept at  
233 Level 1 to capture random between-individual variability in children's average level of  
234 behavioral changes on the factors and the random slope of between-individual variability in  
235 associations between fever conditions and behavioral changes (Model 2). Third, we added the  
236 fixed effect of diagnosis (with TD as the reference) and the interaction effect of diagnosis and  
237 fever condition to Model 2 (Model 3). Model 3 estimates were used to determine the main effect  
238 of diagnosis on behavior rating factor scores and to examine whether children with ASD were  
239 affected differently by fever conditions than TD children. Lastly, multi-level models were fitted  
240 to test the behavioral changes during fever compared to during non-febrile illnesses, and whether  
241 these changes differed by diagnosis.

### 242 *Case Analysis of Children with Behavioral Improvement During Fever*

243 We describe profiles of cases in which caregivers reported behavioral improvements  
244 (score of 5 indicating clear changes) on the same behavioral survey item(s) across at least two  
245 separately reported fevers.

## 246 **Results**

### 247 **Descriptive Analyses of Behavioral Ratings**

248 Table 2 presents the average number of baseline, fever, week-after-fever, and non-febrile  
249 illnesses reported for children, by diagnosis. On average, parents provided 8 baseline survey  
250 reports, plus 2 during a fever, 1.5 the week after a fever, and 2.5 during non-febrile medical  
251 illnesses. A similar proportion of parents of children with and without ASD (50 and 41,  
252 respectively) reported at least one fever event ( $M_{FeverReports} = 2.04$ ); fewer parents completed  
253 behavioral survey ratings in the week after a fever compared to all other conditions.

254 [Insert Table 2]

### 255 **Behavioral Changes During Fever vs. Baseline**

256 Multilevel modeling revealed a significant main fixed effect of fever condition on all  
257 three factors, suggesting that children's social, emotional/ behavioral, and somatic symptoms all  
258 worsened during a fever compared to baseline (see Table 3 for test statistics). When comparing  
259 behaviors during the week after a fever to baseline, the only significant difference was in  
260 emotional and behavioral problems (Factor 2; see Table 3). The random slopes of fever  
261 conditions on behavior changes across all three factors were significant, suggesting that fever  
262 conditions differed for all types of behaviors (see Table 3). The fixed and random effect of fever  
263 condition explained 67% of the variance in Factor 1 behavioral ratings, 36% in Factor 2, and  
264 43% in Factor 3 (see Table 3 for pseudo  $R^2$  values).

265 [Insert Table 3]

266 There was no overall effect of ASD diagnosis for any of the behavioral rating factor  
267 scores. However, a significant interaction was observed for all three behavioral factor scores.  
268 Compared to TD children, children with ASD were reported to have worse social (Factor 1) and  
269 somatic (Factor 3) factor scores during fever than during baseline. Children with ASD also  
270 showed worse emotional/behavioral problems (Factor 2) during the week after a fever compared

271 to baseline ( $ps<.05$ ). However, no significant improvements in model fit were observed when the  
272 main effect of ASD diagnosis and the interaction effect were added.

### 273 **Behavioral Changes During Fever vs. Non-febrile Illness**

274 Multilevel models comparing behavioral changes during a fever to non-febrile illnesses  
275 demonstrated that caregivers reported their children to have worse social and  
276 emotional/behavioral factor scores during fever than during non-febrile illnesses (see Table 4 for  
277 test statistics). The addition of the main fixed effect of diagnosis and the interaction effect of  
278 diagnosis and condition did not improve model fit for any of the behavioral rating factor scores.

279 [Insert Table 4]

### 280 **Cases with Behavioral Improvements During Fever**

281 Figure 1 depicts the proportion of participants who reported positive, negative, and no  
282 changes in response to each behavioral survey item. Three participants, all with ASD between  
283 the ages of 2-7, showed consistent positive changes on the same behavioral survey items during  
284 at least two fevers. Two participants were reported to be less irritable and have behaviors that  
285 were easier to manage during two out of two or three fevers. The third participant was reported  
286 to be less anxious and less irritable during two out of two fevers. Table 5 depicts the SRS-2,  
287 Vineland-3, and PPVT-4 scores of these participants.

288 [Insert Figure 1]

289 [Insert Table 5]

## 290 **Discussion**

291 Results suggest that children with and without ASD demonstrate similar patterns of  
292 behavioral changes in response to fever. In general, children in both groups were reported to  
293 exhibit worse social, emotional/behavioral, and somatic symptoms, with these negative changes

294 even more pronounced among children with ASD. These findings are opposite to numerous  
295 anecdotal reports and at least two empirical studies suggesting behavioral improvements during  
296 fever in children with autism.<sup>4</sup> Nevertheless, our finding that three children with ASD  
297 demonstrated behavioral improvements in response to fever suggest that, while it is certainly not  
298 the norm, a small subset of children may indeed be positively affected by fever.

299 Previous data from the SSC reported that improvements associated with fever were more  
300 likely to occur in children with lower cognitive abilities and higher levels of restricted and  
301 repetitive behaviors. In contrast, many of the children in the current sample diagnosed with ASD  
302 had average or near-average cognitive abilities, which may help explain differences in fever  
303 responses in our sample. Yet, the three individuals who had consistent behavioral improvements  
304 with fevers varied in terms of cognitive and adaptive abilities. Their clear individual differences  
305 complicate potential conclusions about phenotypic patterns related to behavioral improvements  
306 during a fever for this sample.

307 It is possible that predictors of improvement are not at the phenotypic level but, rather, at the  
308 biological level. Some hypothesized mechanisms for improvement in autism symptoms during  
309 fever include the role of the locus coeruleus,<sup>12</sup> inflammatory processes in the cerebellum,<sup>13</sup> and  
310 hypothalamic responses to thermoregulation.<sup>14</sup> Additional research could elucidate the nature of  
311 the association between fever and behavioral changes in children with ASD. If this phenomenon  
312 could be detected reliably in a subset of children with ASD, innovative therapeutic interventions  
313 could be developed from an understanding of the neuronal systems involved in symptom  
314 improvement as a response to fever. However, given the apparent rarity of this phenomenon,  
315 much larger sample sizes would be needed if researchers wanted to identify subgroups of  
316 individuals who respond positively to fever.

317 The ability to compare behavioral changes during a fever to during non-febrile illnesses was  
318 a noteworthy strength of this study's methodology. Results demonstrated that most participants,  
319 TD or ASD, exhibited worsening social and emotional/behavioral symptoms during a fever  
320 compared to non-febrile illnesses. This suggests that it could be the fever itself or possibly the  
321 severity of the illness which we did not rate, as opposed to general immune responses, that are  
322 associated with behavioral changes.

323 This study had a number of limitations. Our sample size was relatively small, leading to  
324 limited power in analyses. Additionally, future studies could include a more diverse sample with  
325 children who are older and have varying cognitive abilities.

### 326 **Conclusions**

327 This study demonstrated that both TD children and those with ASD display worsening  
328 social, emotional and behavioral, and somatic symptoms during fever, even when compared to  
329 non-febrile illnesses. Furthermore, children with ASD were more affected by fevers (i.e., greater  
330 worsening of symptoms) than TD children. Our findings suggests that, while behavioral  
331 improvements during fever may happen for a small subgroup of children with ASD, it likely is  
332 not the norm.

333

## References

1. Good P. Does infectious fever relieve autistic behavior by releasing glutamine from skeletal muscles as provisional fuel? *Med Hypotheses*. 2013;80(1):1-12. doi:10.1016/j.mehy.2012.08.035
2. Grzadzinski R, Lord C, Sanders SJ, Werling D, Bal VH. Children with autism spectrum disorder who improve with fever: Insights from the Simons Simplex Collection. *Autism Res*. 2018;11(1):175-184. doi:10.1002/aur.1856
3. Aman MG, Singh NN, Stewart AW, Field CJ. The aberrant behavior checklist: a behavior rating scale for the assessment of treatment effects. *Am J Ment Defic*. 1985.
4. Curran LK, Newschaffer CJ, Lee LC, Crawford SO, Johnston M V., Zimmerman AW. Behaviors Associated With Fever in Children With Autism Spectrum Disorders. *Pediatrics*. 2007;120(6):e1386-e1392. doi:10.1542/PEDS.2007-0360
5. Dunn LM, Dunn DM. *Manual for the Peabody Picture Vocabulary Test Fourth Edition (PPVT-IV)*. Fourth Edi. Minneapolis, MN: Pearson; 2007.
6. Mullen EM. *Mullen Scales of Early Learning*. Pearson San Antonio, TX; 1995.
7. Richler J, Bishop SL, Kleinke JR, Lord C. Restricted and repetitive behaviors in young children with autism spectrum disorders. *J Autism Dev Disord*. 2007;37(1):73-85. doi:10.1007/S10803-006-0332-6/FIGURES/1
8. Sparrow SS, Cicchetti D V., Saulnier CA. *Vineland Adaptive Behavior Scales Manual Third Edition (VABS-III)*. Third edit. Bloomington, MN: NCS Pearson, Inc.; 2016.
9. Constantino JN, Gruber CP. *Social Responsive Scale (SRS) Manual*. Los Angeles, CA: Western Psychological Services; 2005.
10. Loyd BH, Abidin RR. Revision of the Parenting Stress Index. *J Pediatr Psychol*. 1985;10(2):169-177. doi:10.1093/JPEPSY/10.2.169
11. Achenbach TM, Rescorla LA. Validity of ASEBA preschool scales. *Man ASEBA Presch Forms Profiles*. 2000.
12. Mehler MF, Purpura DP. Autism, fever, epigenetics and the locus coeruleus. *Brain Res Rev*. 2009;59(2):388-392. doi:10.1016/J.BRAINRESREV.2008.11.001
13. Vargas DL, Nascimbene C, Krishnan C, Zimmerman AW, Pardo CA. Neuroglial activation and neuroinflammation in the brain of patients with autism. *Ann Neurol*. 2005;57(1):67-81. doi:10.1002/ANA.20315
14. Fischbach G. *SFARI | Director's Column: Fever's Promising Puzzle.*; 2010. <https://www.sfari.org/2010/01/11/directors-column-fevers-promising-puzzle/>. Accessed February 3, 2022.

Table 1. Demographic Differences by Fever and Diagnosis

|                                          | <u>Fever</u>    |                    | <u>No Fever</u> |                    |
|------------------------------------------|-----------------|--------------------|-----------------|--------------------|
|                                          | ASD<br>(n = 50) | No ASD<br>(n = 43) | ASD<br>(n = 91) | No ASD<br>(n = 60) |
| <b>Demographic Characteristics</b>       |                 |                    |                 |                    |
| Age at intake<br>Mean (SD)               | 5.06 (1.6) **   | 3.37 (1.4) **      | 4.7 (1.6)       | 4.2 (1.6)          |
| Gender (Males)**                         | 80%**           | 51%**              | 82%**           | 56%**              |
| Race (Non-White)                         | 42%             | 39%                | 49%             | 45%                |
| Ethnicity (Hispanic)                     | 24%             | 16%                | 31%             | 20%                |
| <b>Behavioral Measures<br/>Mean (SD)</b> |                 |                    |                 |                    |
| PPVT **<br>Standard Score                | 92.75 (23.1)    | 115.27 (11.4)      | 91.38 (23.2)    | 116.56 (14.8)      |
| PSI **<br>Total Stress Score             | 105.59 (18.9)   | 69.88 (20.1)       | 101.13 (21.5)   | 67.93 (16.2)       |
| ABC – Irritability **<br>(intake)        | 12.15 (9.1)     | 3.39 (4.1)         | 11.72 (8.4)     | 3.27 (5.9)         |
| ABC – Hyperactivity **<br>(intake)       | 18.16 (10.2)    | 4.37 (6.4)         | 18.13 (11.1)    | 4.02 (7.5)         |
| Vineland ABC **<br>Standard Score        | 70.27 (15.3)    | 101.12 (10.6)      | 73.5 (16.2)     | 101.1 (13.3)       |
| SRS **<br>Total T-Score                  | 76.43 (11.0)    | 45.0 (9.3)         | 71.08 (11.56)   | 46.08 (7.1)        |
| CBCL (1.5-5) Internalizing **<br>T-score | 62.04 (10.3)    | 41.58 (14.6)       | 59.16 (15.9)    | 42.61 (10.8)       |
| CBCL (1.5-5) Externalizing **<br>T-score | 57.98 (11.3)    | 41.81 (14.4)       | 56.19 (16.0)    | 42.26 (12.4)       |

Note: \*  $p < .05$ ; \*\*  $p < .01$

Fever group is defined by the individuals who had at least one fever  $\geq 100.0$  degrees Fahrenheit



Table 2. Number of Behavioral Survey Ratings by Diagnosis

|         | Baseline |      |      |         | Fever |      |      |         | Week After Fever |      |      |         | Non-Fever Medical Event |      |      |         |
|---------|----------|------|------|---------|-------|------|------|---------|------------------|------|------|---------|-------------------------|------|------|---------|
|         | N        | Mean | SD   | Range   | N     | Mean | SD   | Range   | N                | Mean | SD   | Range   | N                       | Mean | SD   | Range   |
| ASD     | 134      | 8.25 | 4.68 | [1, 31] | 50    | 1.98 | 1.38 | [1, 7]  | 29               | 1.90 | 1.95 | [1, 11] | 98                      | 2.65 | 2.10 | [1, 10] |
| Non-ASD | 102      | 8.23 | 3.57 | [1, 21] | 41    | 2.10 | 1.80 | [1, 11] | 16               | 1.38 | 0.81 | [1, 4]  | 63                      | 2.58 | 2.28 | [1, 13] |

Table 3. Multilevel Model Comparing Behavior Changes During Fever and the Week After to Baseline

|                                         |                         | Factor 1        |          |                 |          | Factor 2        |          |                 |          | Factor 3        |          |                 |          |
|-----------------------------------------|-------------------------|-----------------|----------|-----------------|----------|-----------------|----------|-----------------|----------|-----------------|----------|-----------------|----------|
|                                         |                         | Model 2         |          | Model 3         |          | Model 2         |          | Model 3         |          | Model 2         |          | Model 3         |          |
| <b>Fixed Effects</b>                    |                         | <b>B (SE)</b>   | <b>p</b> | <b>B (SE)</b>   | <b>p</b> | <b>B (SE)</b>   | <b>p</b> | <b>B(SE)</b>    | <b>p</b> | <b>B(SE)</b>    | <b>p</b> | <b>B(SE)</b>    | <b>p</b> |
| <i>Condition</i>                        | Baseline                | --              | --       | --              | --       | --              | --       | --              | --       | --              | --       | --              | --       |
|                                         | Fever                   | -0.72<br>(0.05) | < .001   | -0.58<br>(0.07) | < .001   | -0.19<br>(0.05) | < .001   | -0.20<br>(0.07) | 0.009    | -0.43<br>(0.05) | < .001   | -0.31<br>(0.07) | < .001   |
|                                         | Week After<br>Fever     | -0.14<br>(0.07) | 0.057    | 0.00<br>(0.12)  | 0.993    | -0.24<br>(0.07) | 0.001    | -0.03<br>(0.13) | 0.820    | -0.05<br>(0.07) | 0.455    | -0.01<br>(0.12) | 0.96     |
| <i>Diagnosis</i>                        | Typically<br>Developing | --              | --       | --              | --       | --              | --       | --              | --       | --              | --       | --              | --       |
|                                         | ASD                     | --              | --       | 0.02<br>(0.05)  | .732     | --              | --       | 0.06<br>(0.04)  | 0.187    | --              | --       | 0.07<br>(0.04)  | 0.111    |
| <i>Interaction<br/>Effects</i>          | ASD * Fever             | --              | --       | -0.26<br>(0.10) | 0.011    | --              | --       | 0.01<br>(0.10)  | 0.898    | --              | --       | -0.22<br>(0.10) | 0.023    |
|                                         | ASD * Week<br>After     | --              | --       | -0.22<br>(0.15) | .153     | --              | --       | -0.32<br>(0.16) | 0.043    | --              | --       | -0.08<br>(0.15) | 0.583    |
| <b>Random Effects<br/>(covariances)</b> |                         | <b>Estimate</b> | <b>p</b> | <b>Estimate</b> | <b>p</b> | <b>Estimate</b> | <b>p</b> | <b>Estimate</b> | <b>p</b> | <b>Estimate</b> | <b>p</b> | <b>Estimate</b> | <b>p</b> |
|                                         | Intercept               | 0.24 (0.01)     | < .001   | 0.02<br>(0.01)  | < .001   | 0.04<br>(0.01)  | < .001   | 0.04<br>(0.01)  | < .001   | 0.04<br>(0.01)  | < .001   | 0.04<br>(0.01)  | < .001   |
|                                         | Condition               | 0.07 (0.01)     | < .001   | 0.08<br>(0.01)  | < .001   | 0.04<br>(0.01)  | < .001   | 0.04<br>(0.01)  | < .001   | 0.04<br>(0.01)  | < .001   | 0.04<br>(0.01)  | < .001   |
| <b>Model Fit Indices</b>                |                         |                 |          |                 |          |                 |          |                 |          |                 |          |                 |          |
|                                         | AIC                     | 2871            |          | 2871            |          | 3606            |          | 3610            |          | 3258            |          | 3262            |          |
|                                         | BIC                     | 2881            |          | 2881            |          | 3617            |          | 3620            |          | 3269            |          | 3272            |          |
|                                         | Pseudo-R <sup>2</sup>   | 0.67            |          | 0.66            |          | 0.36            |          | 0.35            |          | 0.43            |          | 0.43            |          |

Table 4. Multilevel Model Comparing Behavior Changes During Fever to Non-Fever Medical Events

|                                     |                       | <u>Factor 1</u>         |          |                 |          | <u>Factor 2</u> |          |                 |          | <u>Factor 3</u> |          |                 |          |
|-------------------------------------|-----------------------|-------------------------|----------|-----------------|----------|-----------------|----------|-----------------|----------|-----------------|----------|-----------------|----------|
|                                     |                       | Model 2                 |          | Model 3         |          | Model 2         |          | Model 3         |          | Model 2         |          | Model 3         |          |
| <b>Fixed Effects</b>                |                       | <b>B</b><br><b>(SE)</b> | <b>p</b> | <b>B (SE)</b>   | <b>p</b> | <b>B (SE)</b>   | <b>p</b> | <b>B(SE)</b>    | <b>p</b> | <b>B(SE)</b>    | <b>p</b> | <b>B(SE)</b>    | <b>p</b> |
| <i>Condition</i>                    | Non-Fever Medical     | --                      | --       | --              | --       | --              | --       | --              | --       | --              | --       | --              | --       |
|                                     | Fever                 | -0.40<br>(0.05)         | < .001   | -0.29<br>(0.08) | < .001   | 0.04<br>(0.06)  | 0.531    | 0.01<br>(0.09)  | 0.918    | -0.23<br>(0.06) | < .001   | -0.17<br>(0.09) | 0.075    |
| <i>Diagnosis</i>                    | Typically Developing  | --                      | --       | --              | --       | --              | --       | --              | --       | --              | --       | --              | --       |
|                                     | ASD                   | --                      | --       | -0.05<br>(0.07) | <.001    | --              | --       | 0.01<br>(0.08)  | 0.894    | --              | --       | -0.01<br>(0.08) | 0.878    |
| <i>Interaction Effect</i>           | ASD * Fever           | --                      | --       | -0.20<br>(0.10) | 0.056    | --              | --       | 0.05<br>(0.12)  | 0.681    | --              | --       | -0.11<br>(0.12) | 0.351    |
| <b>Random Effects (covariances)</b> |                       | <b>Estimate</b>         | <b>p</b> | <b>Estimate</b> | <b>p</b> | <b>Estimate</b> | <b>p</b> | <b>Estimate</b> | <b>p</b> | <b>Estimate</b> | <b>p</b> | <b>Estimate</b> | <b>p</b> |
|                                     | Intercept             | 0.04<br>(0.02)          | 0.034    | 0.04<br>(0.02)  | 0.021    | 0.08<br>(0.04)  | 0.016    | 0.07<br>(0.04)  | 0.018    | 0.10<br>(0.03)  | < .001   | 0.10<br>(0.03)  | < .001   |
|                                     | Condition             | 0.06<br>(0.02)          | 0.005    | 0.05<br>(0.02)  | 0.014    | 0.05<br>(0.03)  | 0.063    | 0.05<br>(0.03)  | 0.058    | 0.00<br>(0.03)  | 0.466    | 0.00<br>(0.03)  | 0.435    |
| <b>Model Fit Indices</b>            |                       |                         |          |                 |          |                 |          |                 |          |                 |          |                 |          |
|                                     | AIC                   | 743                     |          | 741             |          | 973             |          | 979             |          | 1089            |          | 1093            |          |
|                                     | BIC                   | 753                     |          | 751             |          | 983             |          | 988             |          | 1099            |          | 1103            |          |
|                                     | Pseudo-R <sup>2</sup> | 0.56                    |          | 0.52            |          | 0.36            |          | 0.37            |          | 0.09            |          | 0.11            |          |

---

Table 5. Case Reports of Participants with Consistent Improvement

---

|                             | Participant #1                         | Participant #2              | Participant #3        |
|-----------------------------|----------------------------------------|-----------------------------|-----------------------|
| Diagnosis                   | ASD                                    | ASD                         | ASD                   |
| Behavioral Improvements     | Irritability, Happiness, Bx Management | Irritability, Bx Management | Anxiety, Irritability |
| PPVT Standard Score         | 93                                     | 75                          | 117                   |
| Vineland ABC Standard Score | 92                                     | 63                          | 101                   |
| SRS Total T-Score           | 67                                     | 88                          | 94                    |

---

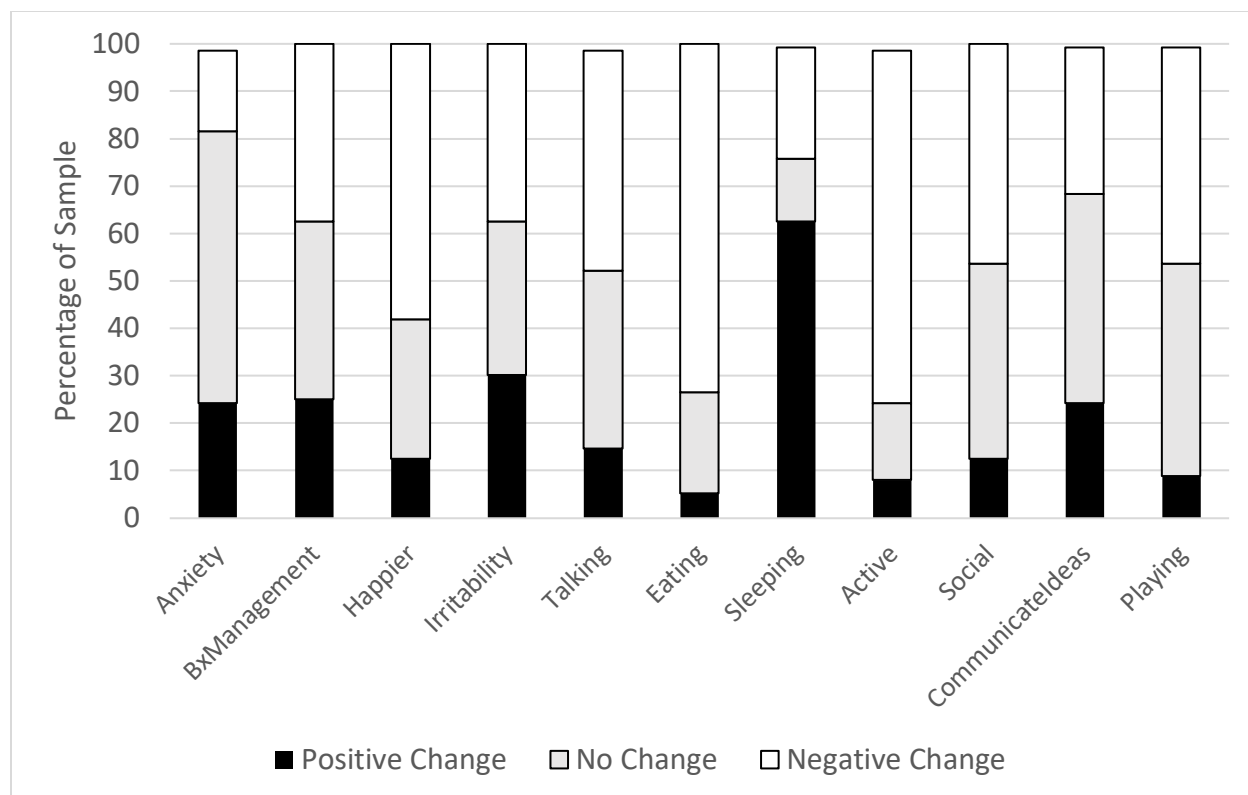

**Figure 1.** Proportion of participants who exhibited positive, negative, and no changes in behavior during a fever.
